# Supplementary material
Source: PubMed Central journal article supplement (PMC3266791)
Supplement: JCI60070sd.pdf [file JCI60070sd.pdf]

# Supplements

A

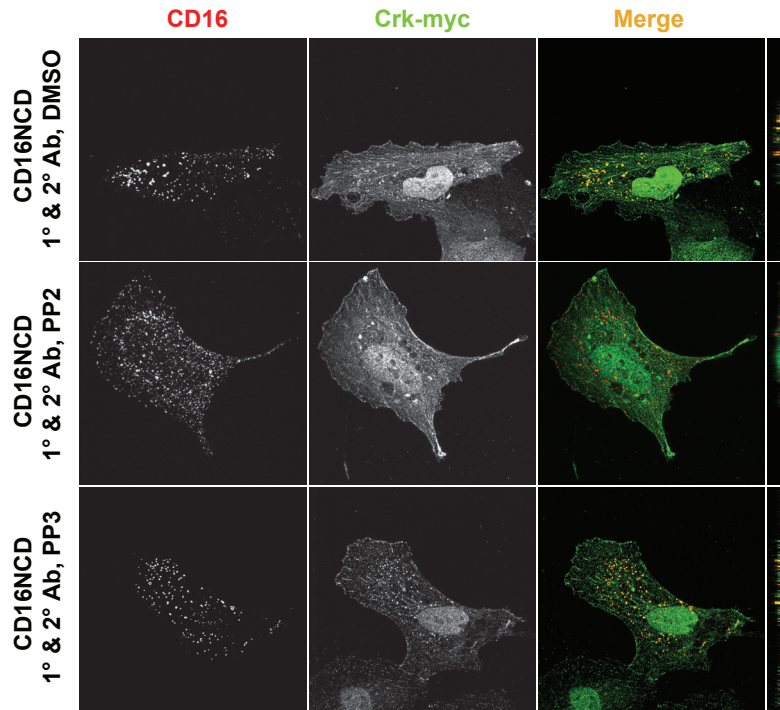

Figure S1.

(A) Src kinase activity is necessary for recruitment of Crk to Nephtrin cytoplasmic domain. Human podocytes expressing CD16/7-NephtrinCD (CD16NCD) were treated with solvent control (DMSO), Src kinase inhibitor PP2 or inactive control compound (PP3) before clustering with anti-CD16 antibody (1°) and secondary anti-mouse IgG antibody (Texas Red). Crk-myc was stained with anti-myc antibody and Alexa Fluor 488-labeled secondary IgG antibody. Co-localization was analyzed by confocal microscopy. YZ planes were reconstructed on the far right. Magnification: 630 X. (B) Clustered, activated CD16/7-NephtrinCD induces lamellipodia formation in cultured human podocytes. CD16/7-NephtrinCD was expressed in human podocytes and was activated as described above. Lamellipodia were visualized by staining actin with fluorophore-coupled phalloidin (green). Arrows indicate lamellipodia. Magnification: 630 X.

B

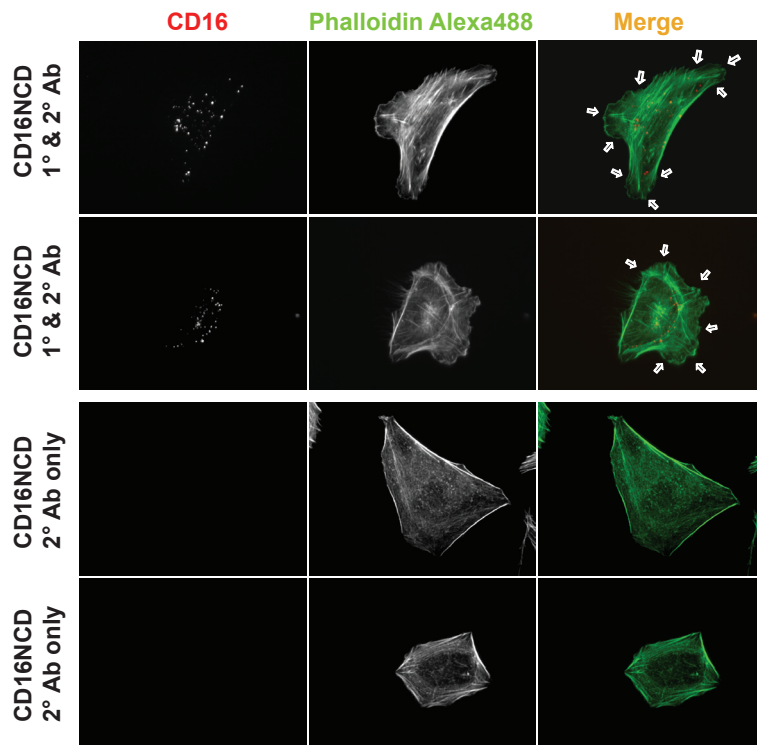

Figure S2.

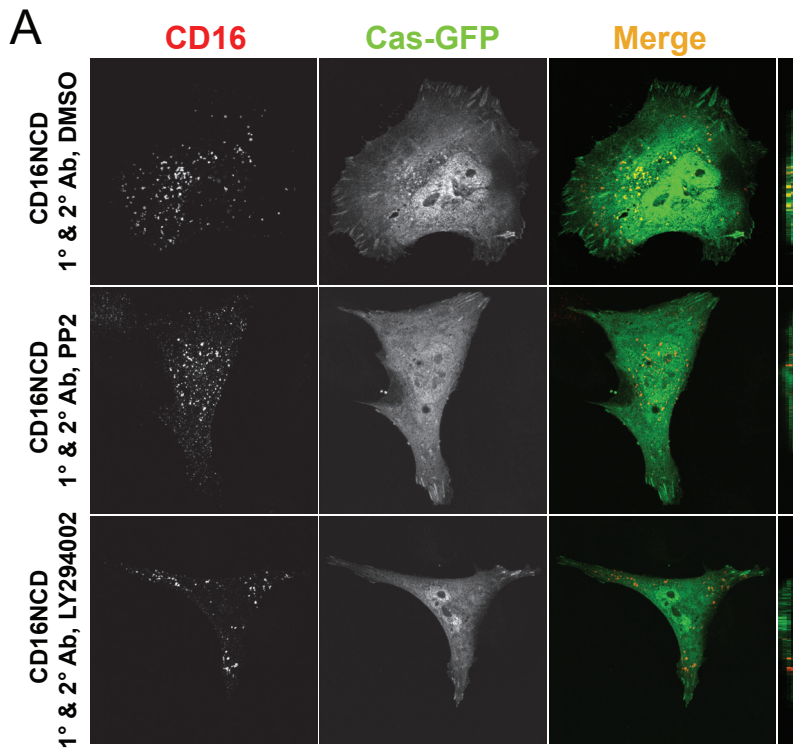

Cas is recruited to Nephrin in a Src and pi-3 kinase dependent manner. (A) Human podocytes expressing CD16/7-NephrinCD and Cas-GFP were treated with solvent control (DMSO), Src kinase inhibitor PP2 or pi-3 kinase inhibitor LY294002 and activated as described above. (B) Podocytes expressing CD16/7-NephrinCD or indicated mutants (red) and Cas-GFP (green) were activated and co-localization was evaluating by confocal microscopy. YZ planes are reconstructed on the far right. Magnification: 630 X.

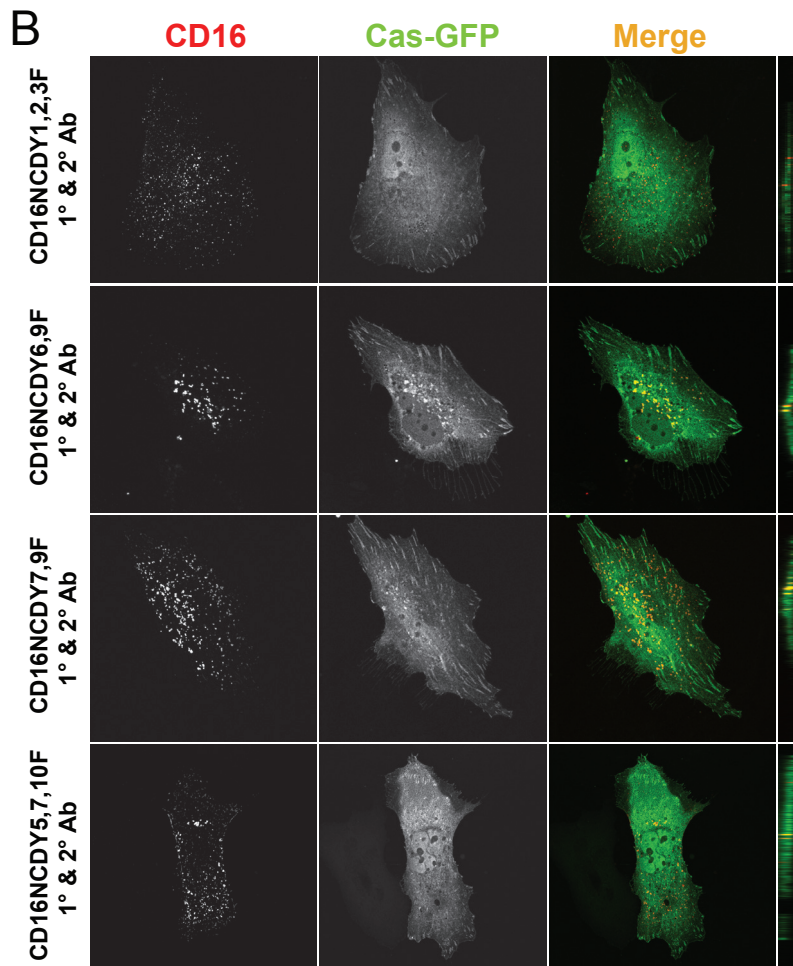

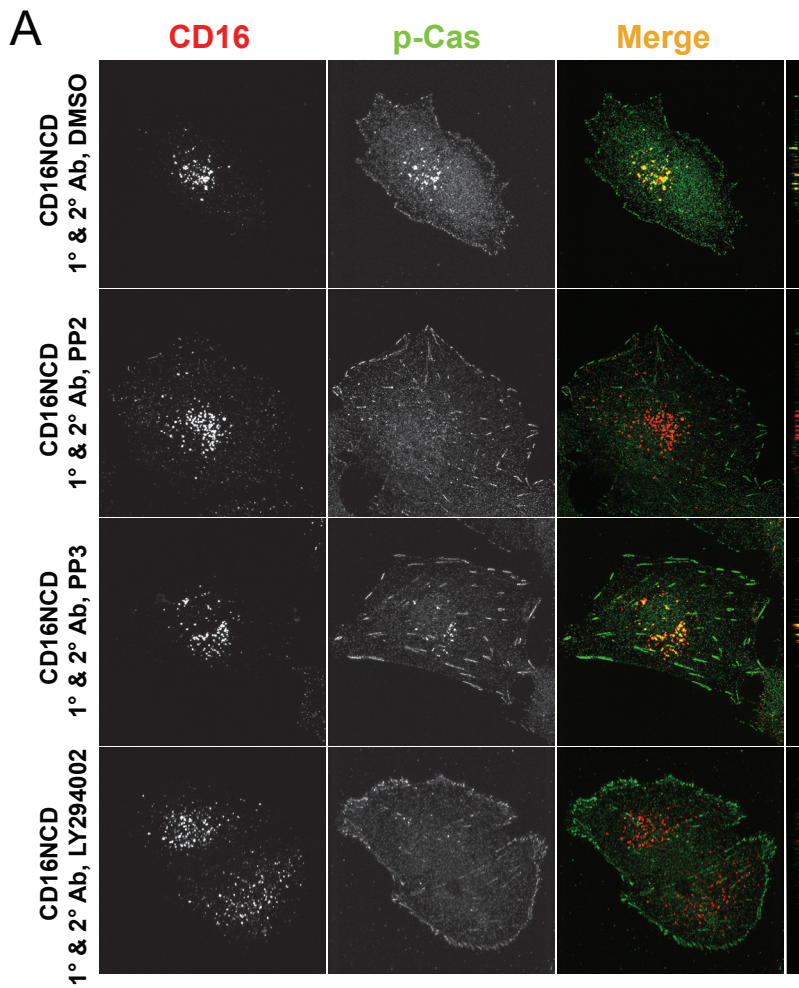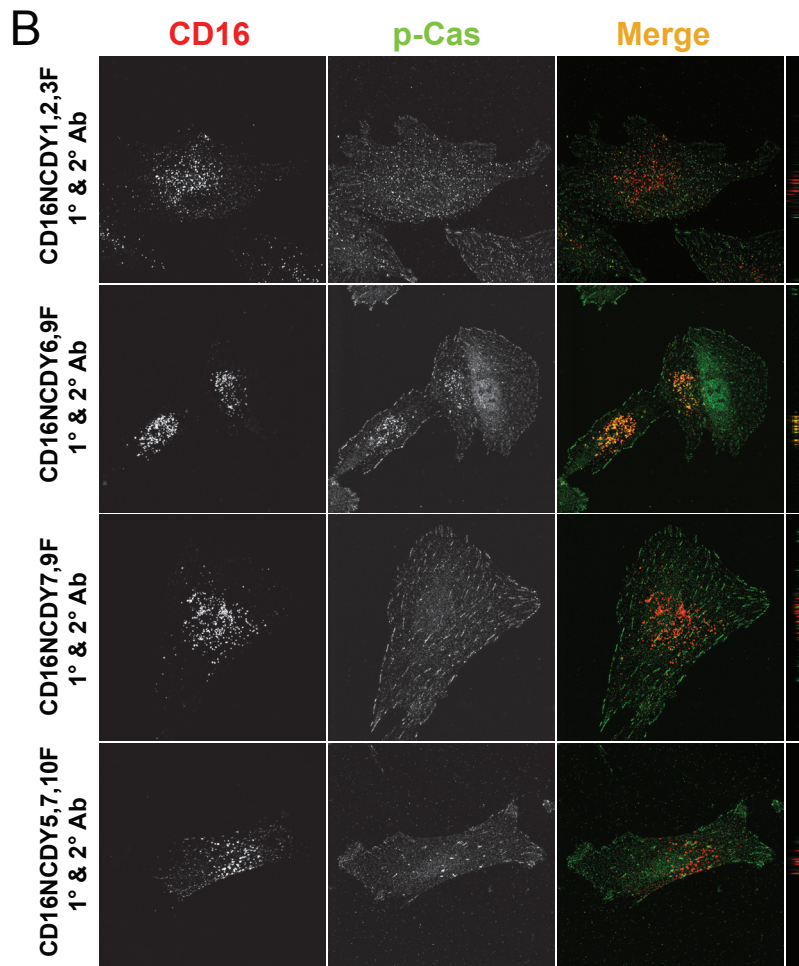

**Figure S3.**

Phosphorylation of Cas in Nephrin clusters depends on pI-3 kinase and Nephrin tyr residues Y5, 7, 10 (A) Human podocytes expressing CD16/7-NephrinCD were treated with DMSO (solvent control), Src kinase inhibitor PP2, inactive control compound PP3 or pI-3 kinase inhibitor LY294002 prior to clustering and p-Cas was stained with anti-p-Cas and secondary IgG antibody (Alexa Fluor 488). (B) Podocytes expressing CD16/7-NephrinCD mutants as indicated were stained and activated as in (A) and analyzed by confocal microscopy. YZ plane reconstructions are shown on the far right. Magnification: 630 X.



**A**

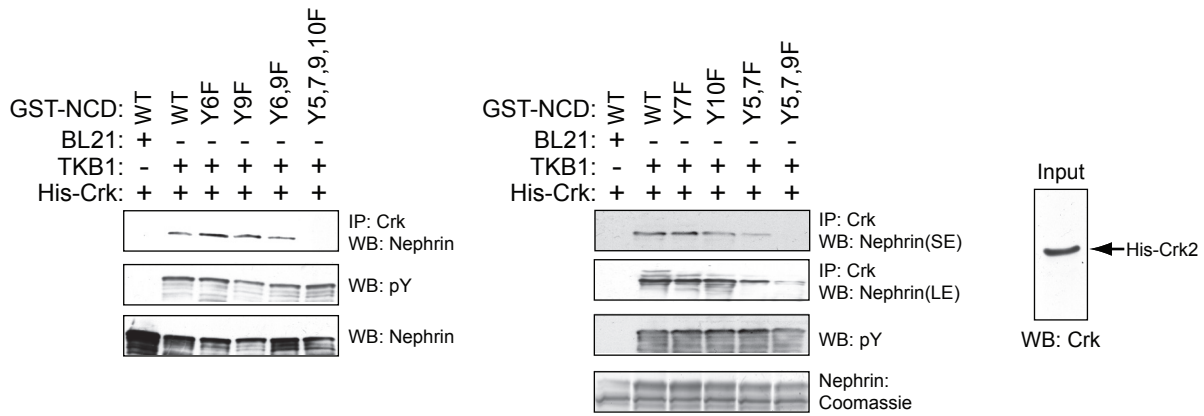

**B**

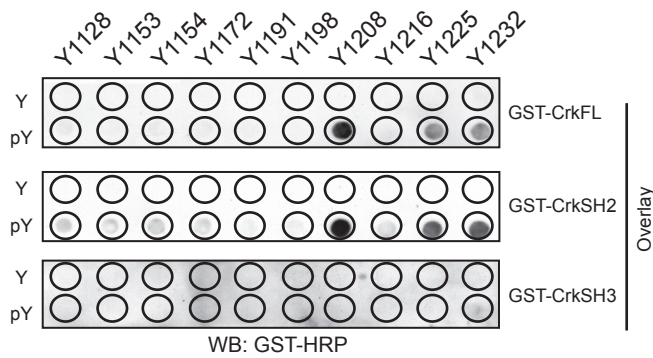

**Figure S4.**

Nephrin and Crk exhibit interaction affinity in vitro. (A) Purified recombinant GST-NephrinCD (GST-NCD) or indicated tyrosine residue mutants were expressed in BL21 or TKB1 *E. coli*. As shown, expression of these recombinant proteins in TKB1 cells results in Nephrin tyrosine phosphorylation. Indicated proteins were incubated with purified recombinant His-Crk2 and pulled down using glutathione agarose. (B) GST-Crk overlay. Nephrin oligopeptides were synthesized with and without phosphorylated tyrosine residues as indicated and arrayed on a nylon membrane. These membranes were incubated with purified recombinant full-length GST-Crk2, or fragments containing only the Crk2 SH2 or SH3 domain. The overlay was assayed with anti-GST antibody conjugated with horseradish peroxidase (HRP).

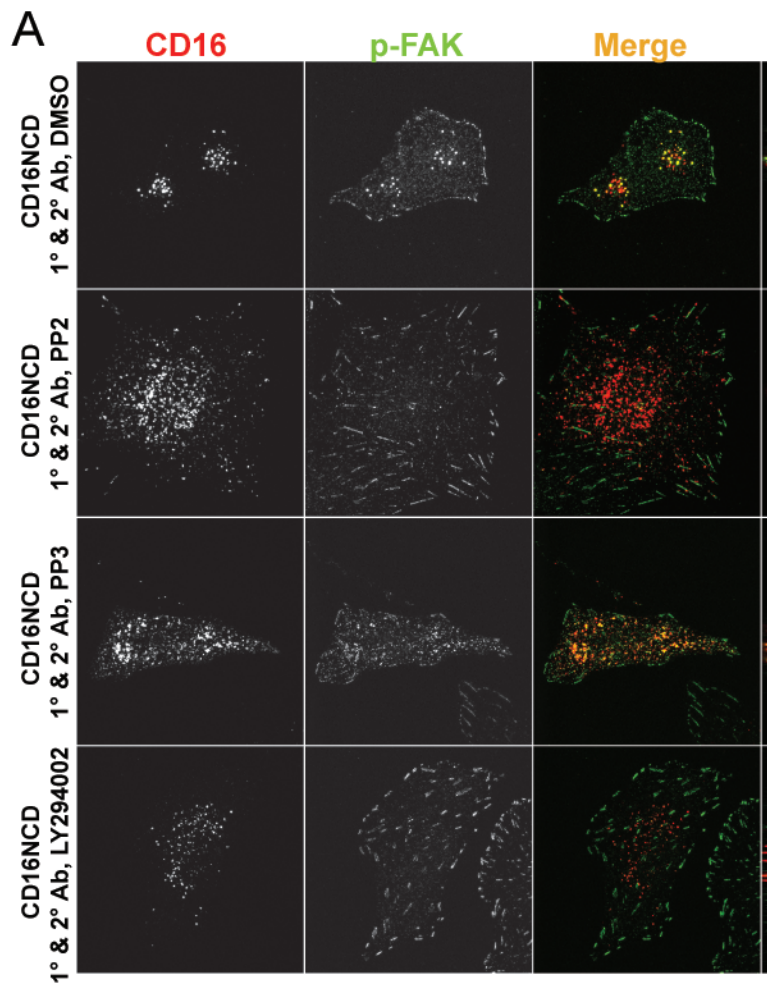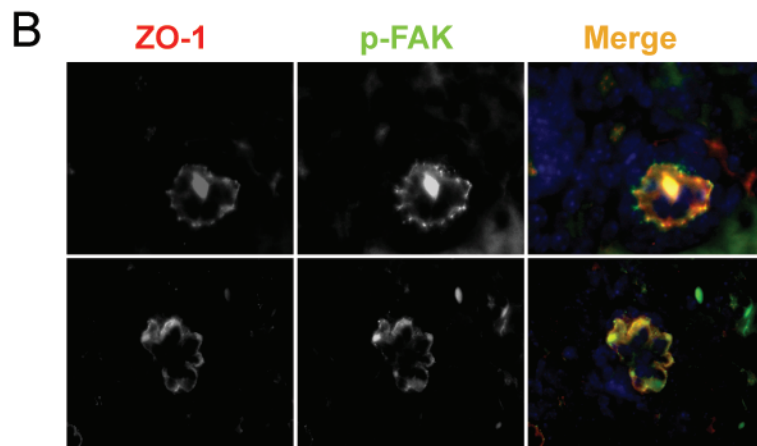

**Figure S5.**

Phosphorylated focal adhesion kinase (FAK) is present in activated Nephrin clusters in the CD16/7-NephrinCD model and at the podocyte precursor intercellular junction in newborn mouse. (A) Human podocytes expressing CD16/7-NephrinCD were treated with solvent control (DMSO), Src kinase inhibitor PP2, inactive control compound or p1-3 kinase inhibitor prior to clustering with anti-CD16 antibody (1°) and Texas Red conjugated secondary IgG antibody. Endogenous p-FAK was stained with phospho-FAK antibody and detected with Alexa Fluor 488 conjugated antibody (green). Co-localization was evaluated by confocal microscopy. (B) Indirect immunofluorescence: Paraffin-embedded mouse newborn kidney sections (4  $\mu$ m) were stained with p-FAK or ZO-1 antibody showing that p-FAK is targeted to the podocyte precursor intercellular junction starting at the late capillary loop stage. Magnification: 630 X.

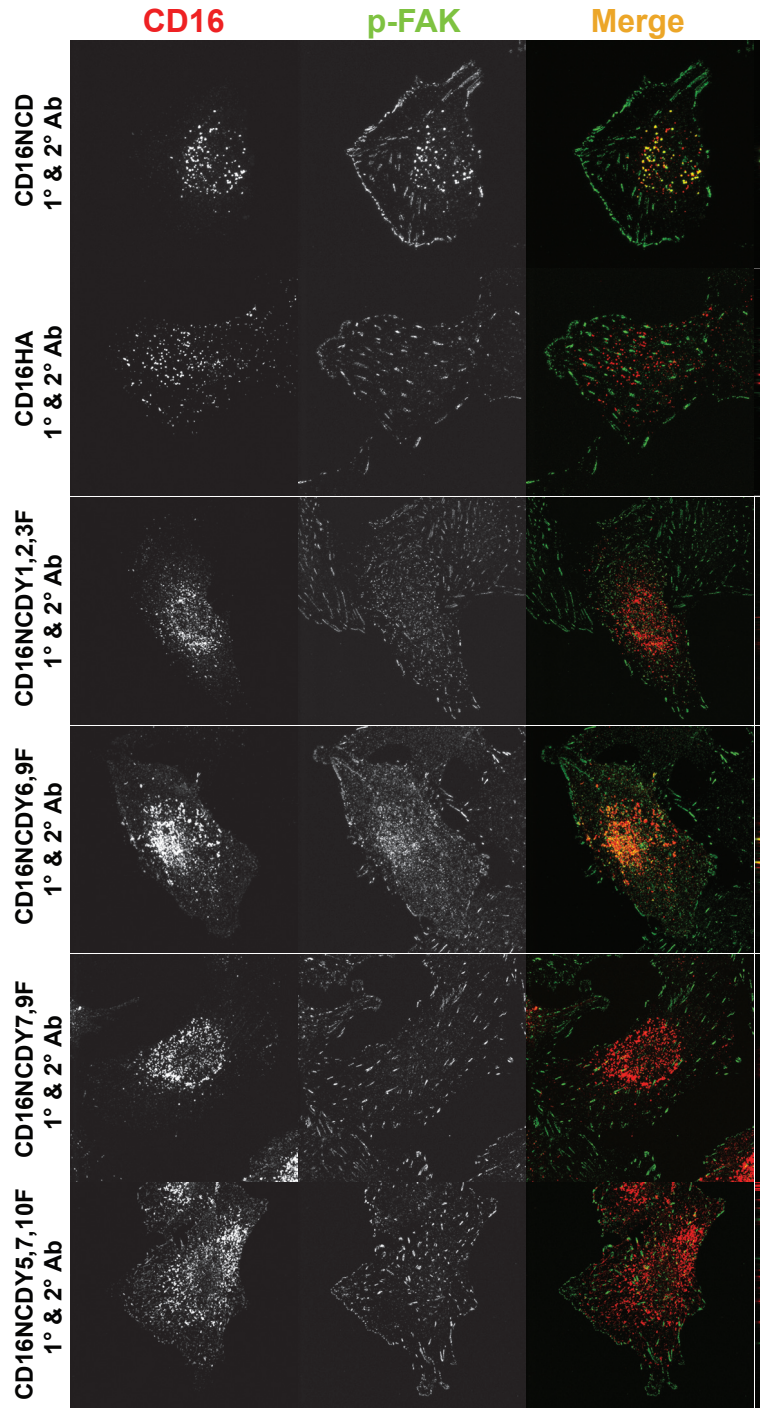

**Figure S6.**

Phosphorylation of FAK in Nephrin clusters requires pi-3 kinase and Nephrin tyr residues Y5, 7, 10. Podocytes expressing CD16/7-NephrinCD or mutants as indicated were activated as previously described (red) and p-FAK was detected by indirect immunofluorescence (green). Co-localization of p-FAK and Nephrin was analyzed by confocal microscopy. Magnification: 630 X.

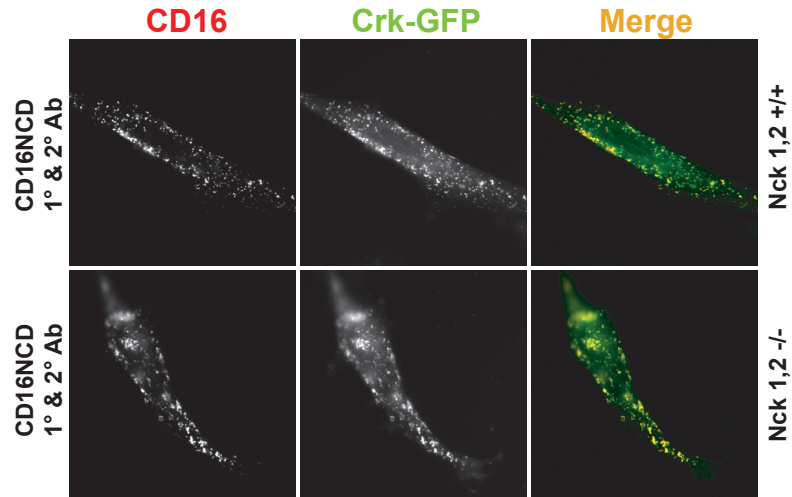

Figure S7.

Nck1/2 is not necessary for Crk recruitment to CD16/7-NephrinCD. Nck wild type (Nck1/2<sup>+/+</sup>) or Nck1 and Nck2 double null MEF (Nck1/2<sup>-/-</sup>) were transfected with plasmid encoding CD16/7-NephrinCD and Crk-GFP and cells were activated as described above. Note that Nephrin and Crk co-localize in Nck1/2 double null MEF (merged images on the right).  
Magnification: 630 X.

## Supplementary Table 1

Human Crk shRNA sequences.

|            | Sequence                                                    |
|------------|-------------------------------------------------------------|
| Crk shRNA1 | CCGGCCTCTTTGACTTTAATGGGAACCTCGAGTTCCCATT AAAGTCAAAGAGGTTTTT |
| Crk shRNA2 | CCGGCATCTTG AGAATCCGGGACAACCTCGAGTTGTCCCGATTCTCAAGATGTTTTT  |
| Crk shRNA3 | CCGGGCTTTACTGGAATTCTACAAACTCGAGTTTGTAGAATTCC AGTAAAGCTTTTT  |
| Crk shRNA4 | CCGGCGCCTCAGTATCGGCT CTGATCTCGAGATCAGAGCCGATACTGAGGCGTTTTT  |
| Crk shRNA5 | CCGGGCGAGCCCTCTTTGACTTTAACTCGAGTTAAAGTCAAAGAG GGCTCGCTTTTT  |



## Supplementary Table 2

Supplementary Table 2 displays sequences of arrayed oligopeptides used in the overlay experiment shown in Supplementary Figure 4B.

| Y#    | Tyrosine#   | Sequence                  |
|-------|-------------|---------------------------|
| Y1    | Y1128       | DRIRNEYEESQWT             |
| pY1   | pY1128      | DRIRNE <b>p</b> YEESQWT   |
| Y2    | Y1153       | AEVDPHYYSMRDFS            |
| pY2   | pY1153      | AEVDPH <b>p</b> YYSMRDFS  |
| pY3   | pY1154      | AEVDPHY <b>p</b> YSMRDFS  |
| Y2,3F | Y1153,1154F | AEVDPH <b>FF</b> SMRDFS   |
| Y4    | Y1172       | TLEEVSYRQAFTG             |
| pY4   | pY1172      | TLEEV <b>S</b> pYRQAFTG   |
| Y5    | Y1191       | AFPGHLYDEVERV             |
| pY5   | pY1191      | AFPGH <b>L</b> pYDEVERV   |
| Y6    | Y1198       | DEVERVYGPPGVW             |
| pY6   | pY1198      | DEVERV <b>p</b> YGPPGVW   |
| Y7    | Y1208       | PGVWGPLYDEVQMDP           |
| pY7   | pY1208      | PGVWG <b>P</b> LpYDEVQMDP |
| Y8    | Y1216       | EVQMDPYDLRWPE             |
| pY8   | pY1216      | EVQMD <b>P</b> pYDLRWPE   |
| Y9    | Y1225       | RWPEVKYEDPRGI             |
| pY9   | pY1225      | RWPEV <b>K</b> pYEDPRGI   |
| Y10   | Y1232       | EDPRGIYDQVAAD             |
| pY10  | pY1232      | EDPR <b>G</b> pYDQVAAD    |
